# Supplementary material
Source: Springer Nature journal article supplement (https://www.springermedizin.de/resource/supplementary/12967_2008_321_MOESM7_ESM.pdf/9576194)

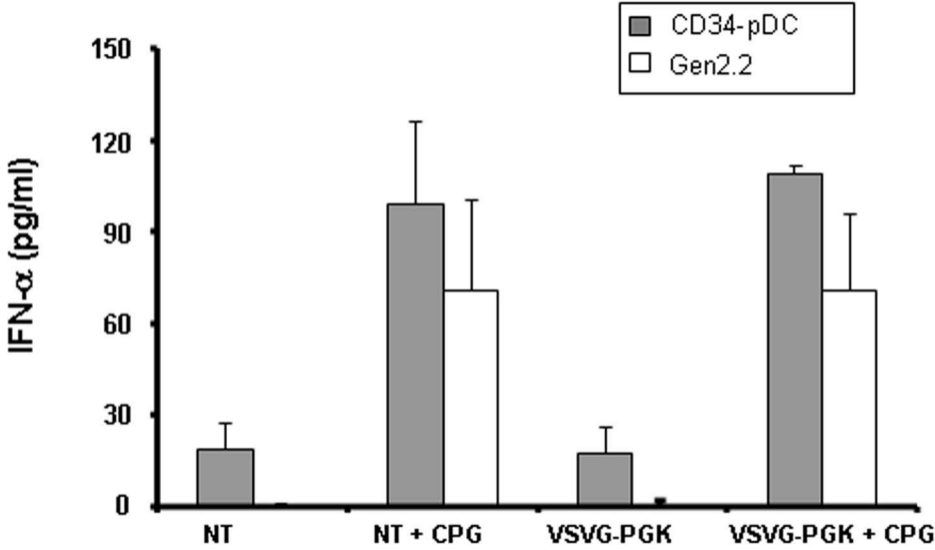

Supplement: MOESM7 [file 9576194]
